# Supplementary material
Source: PubMed Central journal article supplement (PMC1904501)

control MO

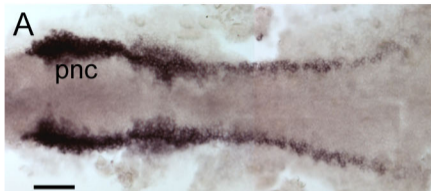

*tfap2a*<sup>MO</sup>/*c*<sup>MO</sup>

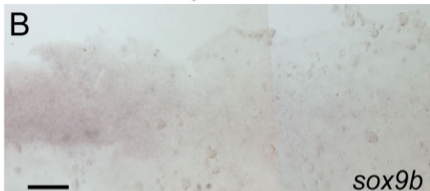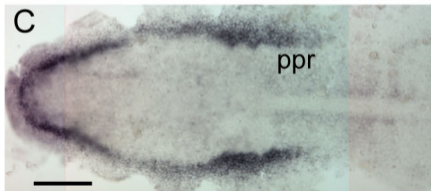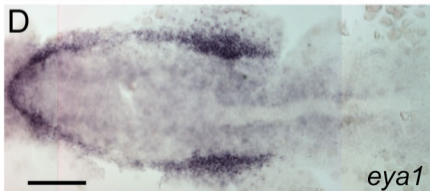

Supplement: NIHMS20662-supplement-FigureS2.pdf [file NIHMS20662-supplement-FigureS2.pdf]

*wt>mitf*

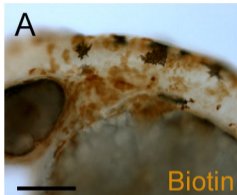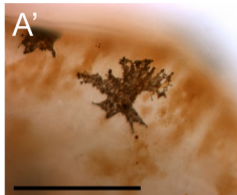

*tfap2a<sup>MO</sup>/c<sup>MO</sup>>mitf*

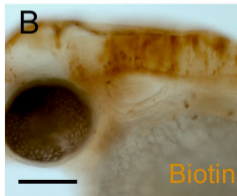

Supplement: NIHMS20662-supplement-FigureS3.pdf [file NIHMS20662-supplement-FigureS3.pdf]

*uninjected*

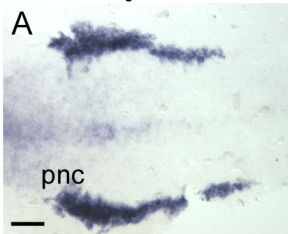

*tfap2a<sup>MO</sup>/c<sup>MO</sup>*

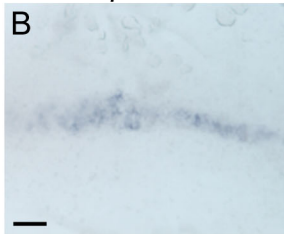

*tfap2a<sup>MO</sup>/c<sup>MO</sup> + tfap2a*

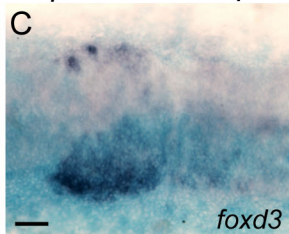

Supplement: NIHMS20662-supplement-FigureS4.pdf [file NIHMS20662-supplement-FigureS4.pdf]
